# Supplementary material for: Sex-specific differences in endoplasmic reticulum aminopeptidase 1 modulation influence blood pressure and renin-angiotensin system responses
Source: JCI journal article supplement (doi:10.1172/jci.insight.129615), 2019-10-31
Supplement: sd1 [file 1]

|                             | Dietary Salt | WT          | ERAP1+/-    |
|-----------------------------|--------------|-------------|-------------|
| Food (g)                    | Restricted   | 3.20 ±0.24  | 3.13 ±0.36  |
|                             | Liberal      | 3.34 ±0.26  | 3.33 ±0.14  |
| Water (ml)                  | Restricted   | 3.60 ±0.52  | 3.46 ±0.29  |
|                             | Liberal      | 7.27 ±0.43  | 7.42 ±0.23  |
| Urine (ml)                  | Restricted   | 1.30 ±0.10  | 1.24 ±0.10  |
|                             | Liberal      | 4.17 ±0.44  | 4.37 ±0.24  |
| 24h Urinary Na+<br>(mmol/d) | Restricted   | 0.03 ±0.02  | 0.02 ±0.03  |
|                             | Liberal      | 0.68 ±0.05  | 0.56 ±0.04  |
| 24h Urinary K+<br>(mmol/d)  | Restricted   | 0.34 ±0.03  | 0.35 ±0.06  |
|                             | Liberal      | 0.29 ±0.02  | 0.27 ±0.02  |
| Heart Rate (BPM)            | Restricted   | 759.7 ±17.7 | 716.2 ±15.4 |
|                             | Liberal      | 731.9 ±13.5 | 723.8 ± 8.1 |
| Activity counts             | Restricted   | 7.5 ±2.1    | 6.6 ±1.0    |
|                             | Liberal      | 10.7 ±3.7   | 9.6 ±2.0    |
| Serum ALDO (ng/dL)          | Restricted   | 35.4 ±3.5   | 40.6 ±3.3   |

**Supplementary Table 1. Characteristics of Endoplasmic reticulum amino peptidase-1-deficient (ERAP1+/-) and Wild-type (WT) littermate mice on liberal and restricted salt diets.** Mice were studied between 18-21 weeks of age. Data are means ±SEM. Aldosterone (ALDO), Potassium (K+), Sodium (Na+), Day (d).

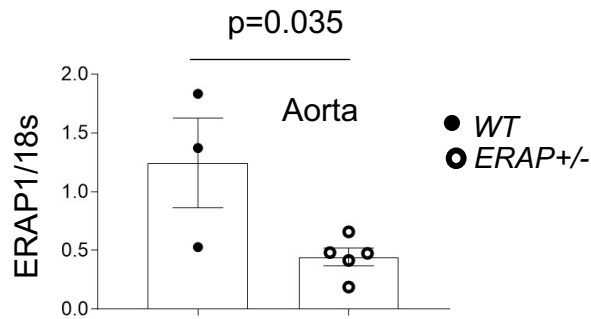

**Supplemental Figure 1. Endoplasmic reticulum amino peptidase-1 (ERAP1) mRNA levels are reduced in aortas from ERAP1 deficient (ERAP1<sup>+/-</sup>) mice compared to wild-type (WT) littermate control mice.** ERAP1 mRNA levels were determined by RT-PCR from aortas as described in Methods. Bars display mean  $\pm$  SEM;  $p$  value was calculated using two-tailed student  $t$  test.

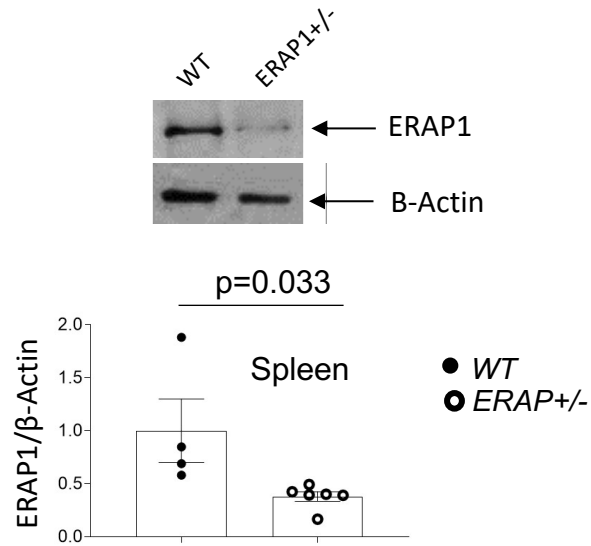

**Supplemental Figure 2. Endoplasmic reticulum amino peptidase-1 (ERAP1) protein levels are reduced in spleens from ERAP1 deficient (ERAP1+/-) mice compared to wild-type (WT) littermate control mice.** Western blot and representative optical densitometry of spleen, normalized to  $\beta$ -actin. Bars display mean  $\pm$  SEM;  $p$  value was calculated using two-tailed student  $t$  test.

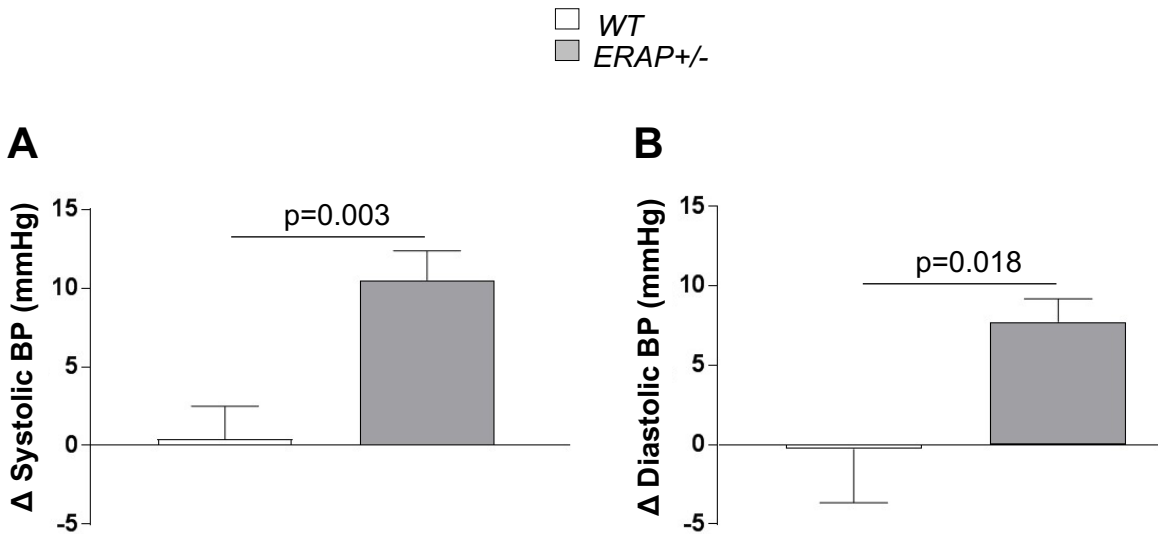

**Supplementary Figure 3. Salt sensitivity of blood pressure (BP) in unrestrained WT and ERAP1<sup>+/-</sup> mice measured using telemetry device implanted in the aortic arch.**

**A)** Salt Sensitivity of BP is estimated from change in systolic BP ( $\Delta$ systolic BP = SBP on 1.6% Na<sup>+</sup> minus SBP on 0.03% Na<sup>+</sup>) **B)** change in diastolic BP ( $\Delta$ diastolic BP = DBP on 1.6% Na<sup>+</sup> minus SBP on 0.03% Na<sup>+</sup>)(replicates: WT n=7, ERAP1<sup>+/-</sup> n=13, \* $p$ <0.02,  $p$  value shows two-tailed student  $t$  test.)

| Tissue          | Normalized Effect Size | p - Value |
|-----------------|------------------------|-----------|
| Tibial Artery   | -0.32                  | 8.0e-12   |
| Aorta           | -0.40                  | 8.9e-11   |
| Adrenal gland   | -0.47                  | 1.2e-12   |
| Coronary Artery | -0.42                  | 0.0000039 |

**Supplementary Table 2. Effect size per *ERAP1* rs30187 allele for reducing *ERAP1* mRNA expression using GTEx Analysis V7 and dbGaP Accession phs000424.v7.p2, February 28, 2019.**
